# Supplementary material for: Epidemiology of traumatic brain injury in Europe
Source: PubMed Central journal article supplement (PMC4569652; doi:10.1007/s00701-015-2512-7), 2015-08-14
Supplement: 701_2015_2512_MOESM2_ESM.pdf [file 701_2015_2512_MOESM2_ESM.pdf]

**ESM Table 2. TBI mortality rate and case fatality rates**

| Study location, (reference)                                                            | Mortality rate per 10 <sup>5</sup> population | In-Hospital No. cases                    | Case fatality rate                         |                                         | Total case fatality rate                          |                                                       |
|----------------------------------------------------------------------------------------|-----------------------------------------------|------------------------------------------|--------------------------------------------|-----------------------------------------|---------------------------------------------------|-------------------------------------------------------|
|                                                                                        |                                               |                                          | No. deaths                                 | per 100 <sup>16</sup>                   | No.deaths                                         | per 100 <sup>16</sup>                                 |
| Aquitaine, France, 1996 (Masson et al, 2001) [19]                                      | 5,2                                           | NR                                       | NR                                         | 30 <sup>1</sup> – 51 <sup>2</sup>       | NR                                                | NR                                                    |
| Austria, 1999-2004, (Rosso et al, 2007) [29]                                           | NR                                            | NR                                       | NR                                         | 31,7 <sup>7</sup>                       | NR                                                | NR                                                    |
| Austria, 2009-2011, (Mauritz et al, 2014) [21]                                         | 11                                            | 73622                                    | 1518                                       | 2,1                                     | 2665                                              | 3,64                                                  |
| Cologne, Germany, 1990-1999 (Maegele et al, 2007) [18]                                 | 3,3                                           | 468 <sup>6</sup>                         | 116                                        | 24,8                                    | 298                                               | 45,8                                                  |
| European regions with different economic status, 2001-2005, (Mauritz et al, 2008) [22] | NR                                            | HI: 406; UMI: 337; LMI: 429 <sup>8</sup> | HI: 170; UMI: 162; LMI: 234 <sup>8,9</sup> | HI: 42; UMI: 48; LMI: 55 <sup>8,9</sup> | NR                                                | NR                                                    |
| Finland, 1991-2005, (Koskinen, 2008) [14]                                              | 18,3 <sup>10</sup>                            | 27138                                    | 1378                                       | 5,1 <sup>11</sup>                       | 14131                                             | 18,1 <sup>12</sup>                                    |
| Germany, 1996 (Firsching, 2001) [7]                                                    | 11,5                                          | NR                                       | NR                                         | NR                                      | NR                                                | NR                                                    |
| Germany, 2000 (Steudel et al, 2005) [34]                                               | 9,4 (1999)                                    | 276758 (1999)                            | 2723                                       | 1,0                                     | 7705 (1999)                                       | 2,7                                                   |
| Greece, (Katsaragakis et al, 2010) [13]                                                | NR                                            | 3383                                     | 144                                        | 4,3 <sup>6</sup>                        | 389                                               | 11,5                                                  |
| Hannover & Münster, Germany, 2000-2001, (Rickels et al, 2010) [27]                     | 3,0 <sup>6</sup>                              | 5221                                     | 47                                         | 0,9 <sup>6</sup>                        | 66                                                | 0,97 <sup>6</sup>                                     |
| Milan & Monza, Italy, 1997-2007, (Stocchetti et al, 2012) [35]                         | NR                                            | 1366                                     | 416 <sup>13</sup>                          | 33 <sup>13</sup>                        | NR                                                | NR                                                    |
| Northeast Italy, 1996-2000 (Baldo et al 2003) [5]                                      | 7,0 <sup>3</sup>                              | 11074 <sup>3</sup>                       | 314 <sup>4</sup>                           | 3,1 <sup>4</sup>                        | NR                                                | NR                                                    |
| Northern Ostrobothnia, Finland, 1999 and 2007, (Puljula et al, 2013) [26]              | NR                                            | NR                                       | NR                                         | NR                                      | 156                                               | 58 <sup>6</sup>                                       |
| Norway, 2009-2010, (Andelic et al, 2012) [1]                                           | NR                                            | 278                                      | 80                                         | 29                                      | NR                                                | NR                                                    |
| Oslo, Norway, 2005-2006 (Andelic et al, 2008)[2]                                       | NR                                            | 445                                      | 9                                          | 2,0                                     | NR                                                | NR                                                    |
| Romagna, Italy, 1998 (Servadei et al, 2002) [31]                                       | 18,3                                          | 2890                                     | 125                                        | 2,8 <sup>5</sup>                        | 225                                               | 7,8 <sup>5</sup>                                      |
| Romagna & Trentino, Italy, (Servadei et al, 2002) [32]                                 | NR                                            | 4442 <sup>6</sup>                        | 85 <sup>6</sup>                            | 1,9 <sup>6</sup>                        | NR                                                | NR                                                    |
| South East Finland, 2002-2004, (Numminen, 2011) [24]                                   | NR                                            | 370                                      | 28 <sup>14</sup>                           | 7,6 <sup>6,14</sup>                     | NR                                                | NR                                                    |
| The Netherlands, 2008-2009 (Andriessen et al, 2011) [4]                                | NR                                            | 508 (339 severe & 169 moderate TBI)      | 143                                        | 28,1 <sup>6</sup>                       | 169 ( 140 severe & 29 moderate TBI) <sup>15</sup> | 33,3 ( 46 severe & 21 moderate TBI ) <sup>6, 15</sup> |

<sup>1</sup> overall severe, <sup>2</sup> patients in coma with H AIS of 5, <sup>3</sup> average over 5 years, <sup>4</sup> derived from population average and TBI mortality rate, <sup>5</sup> includes residents, and non-residents, <sup>6</sup> tabled value(s) were calculated from published data, <sup>7</sup> ICU fatality rate, <sup>8</sup> HI: High Income; UMI: Upper Middle Income; LMI: Low Middle Income, <sup>9</sup> after 90 days <sup>10</sup> average over 15 years, <sup>11</sup> in period 2001-2005, <sup>12</sup> in period 1991-2005, <sup>13</sup> after 6 months, <sup>14</sup> in first month, <sup>15</sup> After 6 months follow up, <sup>16</sup> rate/100 patient
