# Supplementary material for: Epidemiology of traumatic brain injury in Europe
Source: Springer Nature journal article supplement (doi:10.1007/s00701-015-2512-7), 2015-08-12
Supplement: MOESM1 [file 8634598]

**ESM Table 1. Pubmed search terms**

| <b>Search terms</b>                                                             | <b>Selection criteria</b>                                            | <b>Number of hits</b>                 |
|---------------------------------------------------------------------------------|----------------------------------------------------------------------|---------------------------------------|
| (Brain Injur* [Title/Abstract]) AND<br>(Epidemiology [Title/Abstract])          | - English<br>- Full text available<br>- Publication dates: 1990-2014 | 273                                   |
| (Head Injur* [Title/Abstract]) AND<br>(Epidemiology [Title/Abstract])           | - English<br>- Full text available<br>- Publication dates: 1990-2014 | 216                                   |
| (Brain injur*[Title/Abstract]) AND<br>( Incidence[Title/Abstract]<br>AND Europe | - English<br>- Full text available<br>- Publication dates: 1990-2014 | 125                                   |
| (Head Injur*[Title/Abstract]) AND<br>Incidence[Title/Abstract]<br>AND Europe    | - English<br>- Full text available<br>- Publication dates: 1990-2014 | 129                                   |
| <b>Total identified articles</b>                                                | <b>Duplicates</b>                                                    | <b>Potentially relevant citations</b> |
| 743                                                                             | 109                                                                  | 634                                   |
